# Supplementary material for: Sensing of NO2 with zirconium hydroxide via frequency-dependent electrical impedance spectroscopy
Source: Royal Society of Chemistry journal article supplement (doi:10.1039/c7dt02034a), 2017-01-01
Supplement: c7dt02034a1.pdf [file c7dt02034a1.pdf]

**Supplementary Information For**

**Sensing of NO<sub>2</sub> with Zirconium Hydroxide via Frequency-  
Dependent Electrical Impedance Spectroscopy**

Coleman R. Harris<sup>1,2</sup>, Jennifer R. Soliz<sup>4</sup>, Andrew D. Klevitch<sup>1,2</sup>, Michael J. Bartz<sup>1,2</sup>, Joseph A. Rossin<sup>3</sup>, Augustus W. Fountain III<sup>4</sup>, Adam J. Hauser<sup>1,2</sup>, and Gregory W. Peterson<sup>4,\*</sup>

<sup>1</sup>*Department of Physics and Astronomy, University of Alabama, Tuscaloosa, AL 35487*

<sup>2</sup>*Center for Materials for Information Technology, University of Alabama, Tuscaloosa, AL 35487*

<sup>3</sup>*Guild Associates, Inc., 5750 Shier-Rings Road, Dublin, Ohio 43016*

<sup>4</sup>*Edgewood Chemical Biological Center, 5183 Blackhawk Road, Aberdeen Proving Ground,  
Maryland 21010-5424*

\*Corresponding author: Gregory W. Peterson, Email: [gregory.w.peterson.civ@mail.mil](mailto:gregory.w.peterson.civ@mail.mil); Ph: (410) 436-9794

## ATR-FTIR

Figure S1 shows a schematic of the system used to expose the samples to NO<sub>2</sub> gas. The BET surface area and pore volume for the samples are reported in Table S1. After various concentrations of NO<sub>2</sub> gas exposure, ATR-FTIR spectra were collected to confirm adsorption of NO<sub>2</sub> on Zr(OH)<sub>4</sub> using a Bruker Tensor 27 FTIR with a platinum accessory and a single reflection diamond crystal. An average of sixteen scans from 400-2000 cm<sup>-1</sup> with background subtraction was collected. The instrument resolution was 4 cm<sup>-1</sup>. Samples were evaluated on unexposed and nitrogen dioxide exposed. As shown in Figure S2, there are asymmetrical and symmetrical N–O vibrational stretches in the 1550 and 1365 cm<sup>-1</sup> regions, respectively, and the asymmetric stretch of N–O at 1530 cm<sup>-1</sup> is observed more clearly at 1000 ppm than at lower concentrations of NO<sub>2</sub>. These results support adsorption of NO<sub>2</sub> on the surface. Other unspecified peaks in the fingerprint region are intrinsic to the Zr(OH)<sub>4</sub>, e.g. Zr–O and some weak O–H stretches.

| <b>Material</b>                                         | <b>BET Surface Area<br/>(m<sup>2</sup>/g)</b> | <b>Pore Volume<br/>(cc/g)</b> |
|---------------------------------------------------------|-----------------------------------------------|-------------------------------|
| Zr(OH) <sub>4</sub> powder                              | 407                                           | 0.81                          |
| Zr(OH) <sub>4</sub> Pressed @ 5 kpsi                    | 390                                           | 0.68                          |
| Zr(OH) <sub>4</sub> exposed to 1000 ppm NO <sub>2</sub> | 309                                           | 0.55                          |

**Table S1.** BET surface area and pore volume for samples after pressing and exposure to nitrogen dioxide.

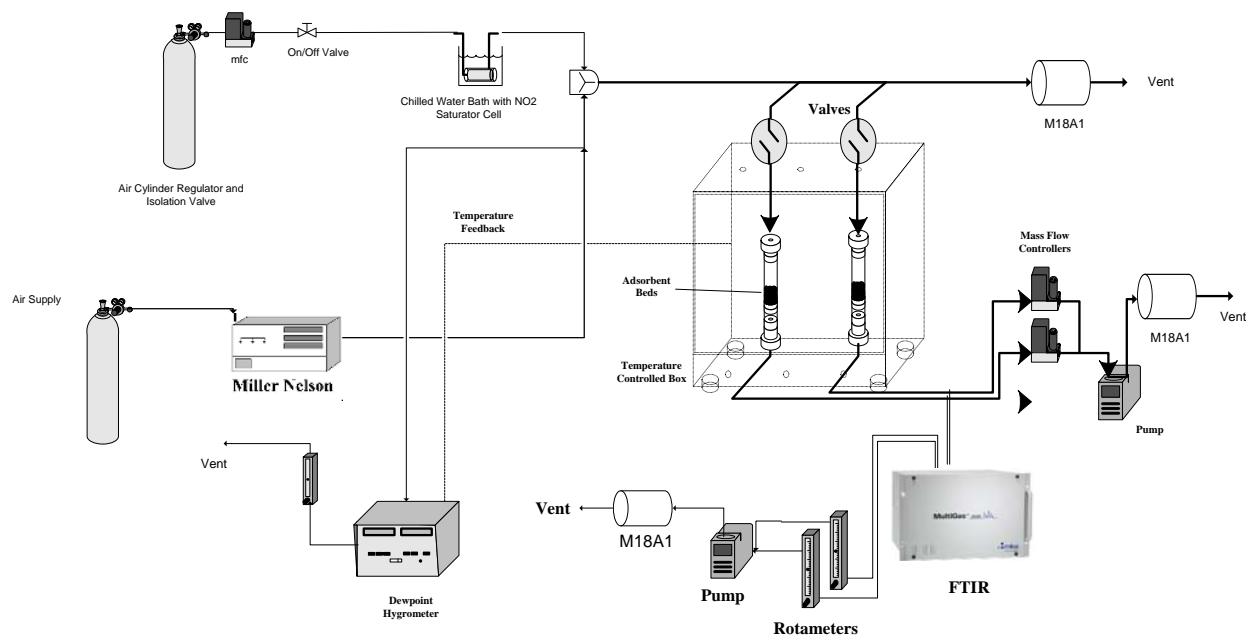

**Figure S1.** Schematic of the system and dosing setup.

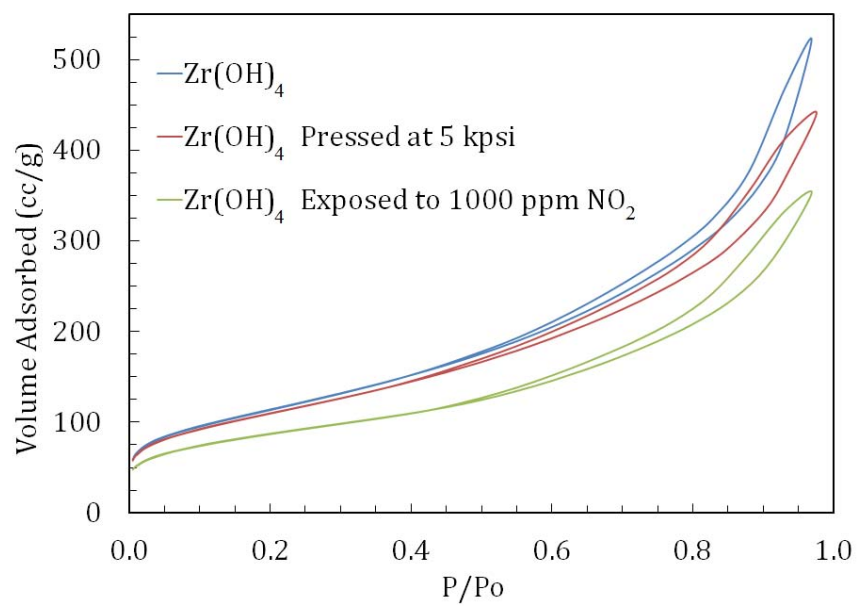

**Figure S2.** Nitrogen isotherm data for zirconium hydroxide after pressing and exposure to nitrogen dioxide.

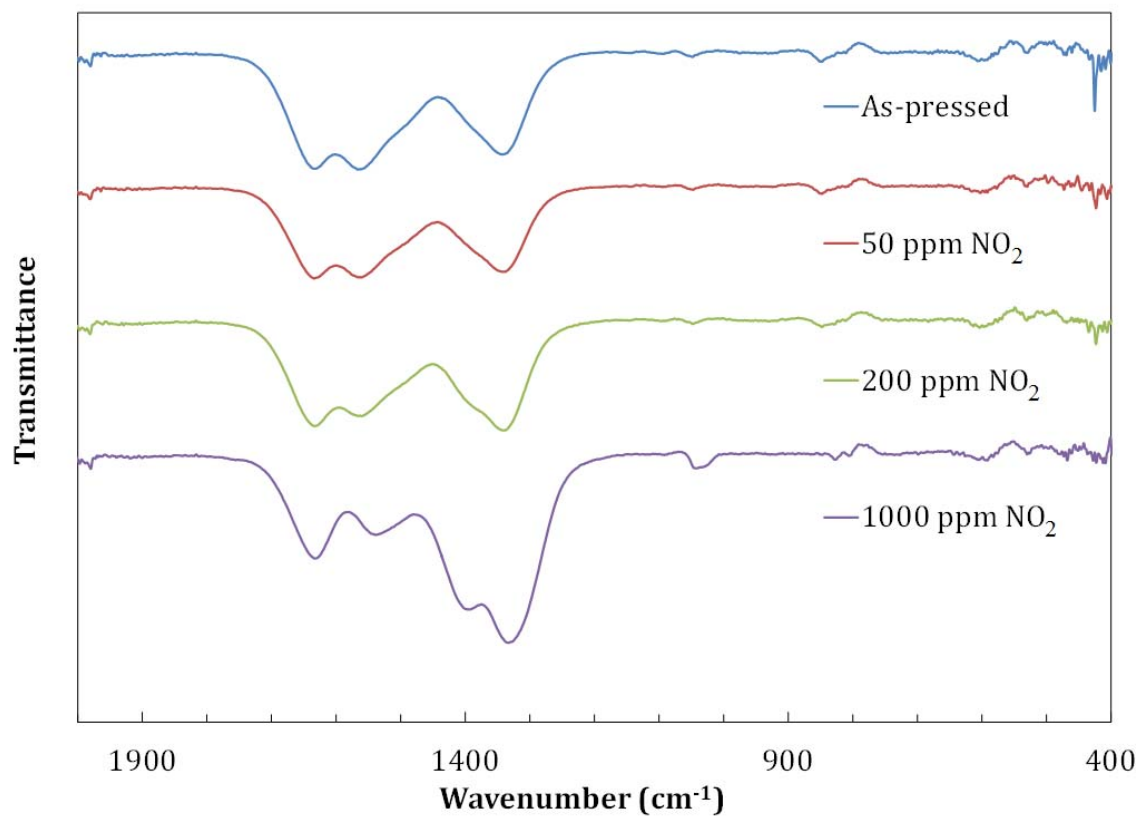

**Figure S3.** Waterfall plot of attenuated total reflectance Fourier infrared spectra for Zr(OH)<sub>4</sub> (blue) and Zr(OH)<sub>4</sub> exposed to 50 (red), 200 (green), and 1000 ppm·h (purple) of NO<sub>2</sub>.

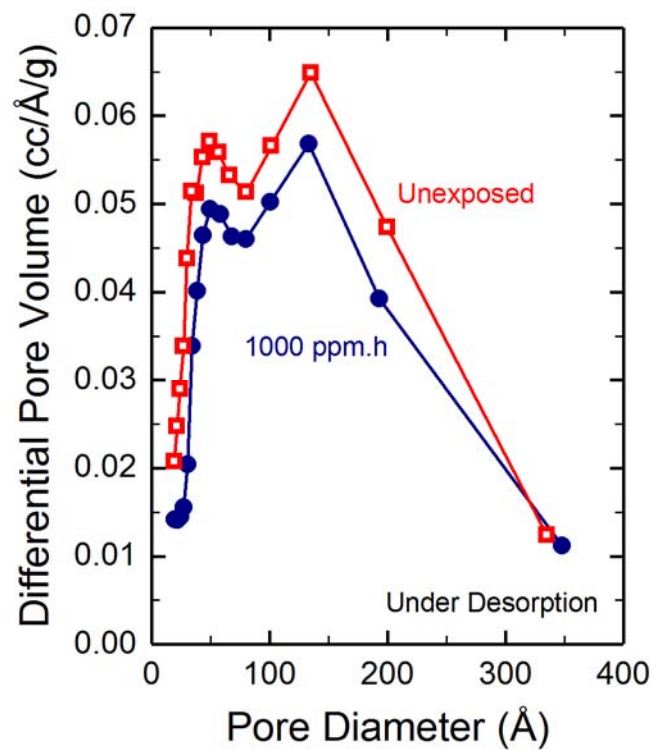

**Figure S4.** Differential pore size distributions (pore volume as a function of pore diameter) under N<sub>2</sub> desorption for unexposed Zr(OH)<sub>4</sub> (open red squares) and Zr(OH)<sub>4</sub> exposed to 1000 ppm·h dose (solid blue circles) of NO<sub>2</sub>.
